# Supplementary material for: Knockdown hsa_circ_0063526 inhibits endometriosis progression via regulating the miR-141-5p / EMT axis and downregulating estrogen receptors
Source: publisher site journal article supplement (doi:10.18632/aging.203799), 2021-12-30
Supplement: Supplementary file [file aging-v13i24-203799-supplementary-material-SD2.pdf]

## SUPPLEMENTARY TABLE

**Supplementary Table 1. Clinical characteristics of the patients.**

| <b>Specimen number</b> | <b>Diseases</b>       | <b>The menstrual cycle</b> | <b>Source of parts</b> | <b>Age</b> | <b>Stage</b> |
|------------------------|-----------------------|----------------------------|------------------------|------------|--------------|
| YW-B-01                | Ovarian endometriosis | Proliferative phase        | The right ovary        | 28         | IV           |
| YW-B-02                | Ovarian endometriosis | Proliferative phase        | The right ovary        | 30         | III          |
| YW-B-03                | Ovarian endometriosis | Proliferative phase        | The right ovary        | 41         | III          |
| YW-B-04                | Ovarian endometriosis | Proliferative phase        | The right ovary        | 26         | III          |
| YW-B-05                | Ovarian endometriosis | Proliferative phase        | The right ovary        | 26         | III          |
| YW-B-06                | Ovarian endometriosis | Proliferative phase        | The left ovary         | 31         | IV           |
| YW-B-07                | Ovarian endometriosis | Proliferative phase        | The left ovary         | 28         | IV           |
| YW-B-08                | Ovarian endometriosis | Proliferative phase        | The left ovary         | 28         | IV           |
| YW-B-09                | Ovarian endometriosis | Proliferative phase        | The right ovary        | 38         | III          |
| YW-B-10                | Ovarian endometriosis | Proliferative phase        | The right ovary        | 24         | III          |
| YW-B-11                | Ovarian endometriosis | Proliferative phase        | The right ovary        | 28         | III          |
| YW-B-12                | Ovarian endometriosis | Proliferative phase        | The right ovary        | 29         | III          |
| YW-B-13                | Ovarian endometriosis | Proliferative phase        | The right ovary        | 26         | III          |
| YW-B-14                | Ovarian endometriosis | Proliferative phase        | The left ovary         | 38         | IV           |
| YW-B-15                | Ovarian endometriosis | Proliferative phase        | The right ovary        | 34         | III          |
| YW-B-16                | Ovarian endometriosis | Proliferative phase        | The left ovary         | 35         | IV           |
| YW-B-17                | Ovarian endometriosis | Proliferative phase        | The left ovary         | 31         | IV           |
| YW-B-18                | Ovarian endometriosis | Proliferative phase        | The left ovary         | 29         | III          |
| YW-B-19                | Ovarian endometriosis | Proliferative phase        | The right ovary        | 27         | III          |
| YW-B-20                | Ovarian endometriosis | Proliferative phase        | The right ovary        | 38         | IV           |
| YW-B-21                | Ovarian endometriosis | Proliferative phase        | Bilateral ovaries      | 26         | IV           |
| YW-B-22                | Ovarian endometriosis | Proliferative phase        | The left ovary         | 35         | IV           |
| YW-B-23                | Ovarian endometriosis | Proliferative phase        | The left ovary         | 30         | III          |
| YW-B-24                | Ovarian endometriosis | Proliferative phase        | The right ovary        | 38         | IV           |
| YW-B-25                | Ovarian endometriosis | Proliferative phase        | The right ovary        | 38         | III          |
| YW-B-26                | Ovarian endometriosis | Proliferative phase        | The right ovary        | 29         | III          |
| YW-B-27                | Ovarian endometriosis | Proliferative phase        | The right ovary        | 31         | III          |
| YW-B-28                | Ovarian endometriosis | Proliferative phase        | The right ovary        | 29         | III          |
| YW-B-29                | Ovarian endometriosis | Proliferative phase        | The right ovary        | 38         | III          |
| YW-B-30                | Ovarian endometriosis | Proliferative phase        | The right ovary        | 27         | III          |
| YW-B-31                | Ovarian endometriosis | Proliferative phase        | The right ovary        | 26         | IV           |
| DZ-N-01                | Secondary infertility | Proliferative phase        | Endometrium            | 40         | -            |
| DZ-N-02                | Secondary infertility | Proliferative phase        | Endometrium            | 41         | -            |
| DZ-N-03                | Secondary infertility | Proliferative phase        | Endometrium            | 32         | -            |
| DZ-N-04                | Secondary infertility | Proliferative phase        | Endometrium            | 30         | -            |
| DZ-N-05                | Secondary infertility | Proliferative phase        | Endometrium            | 27         | -            |
| DZ-N-06                | Secondary infertility | Proliferative phase        | Endometrium            | 26         | -            |
| DZ-N-07                | Secondary infertility | Proliferative phase        | Endometrium            | 39         | -            |
| DZ-N-08                | Secondary infertility | Proliferative phase        | Endometrium            | 29         | -            |
| DZ-N-09                | Secondary infertility | Proliferative phase        | Endometrium            | 43         | -            |
| DZ-N-10                | Secondary infertility | Proliferative phase        | Endometrium            | 27         | -            |
